# Supplementary material for: Lipoproteins comprise at least 10 different classes in rats, each of which contains a unique set of proteins as the primary component
Source: PLoS One. 2018 Feb 20;13(2):e0192955. doi: 10.1371/journal.pone.0192955 (PMC5819787; doi:10.1371/journal.pone.0192955)
Supplement: S4 Table — (XLSX) [file pone.0192955.s018.xlsx]

## Sheet: S4 Table
		sample A			sample A2			sample B			sample C			sample C2			sample D
		cho	TG	UV	cho	TG	UV	cho	TG	UV	cho	TG	UV	cho	TG	UV	cho	TG	UV
	CM(v)	0.351689	0.327107	0.367258	0.33741	0.297687	0.334306	0.340325	0.316937	0.349659	0.322818	0.307854	0.351132	0.357507	0.342027	0.409127	0.352045	0.331281	0.403857
	CM	0.723512	0.63823	0.882461	0.759971	0.653399	1.00783	0.772359	0.697377	0.934459	0.912203	0.735534	1.04641	0.915682	0.964915	1.17244	0.996879	1.13388	1.2489
	VLDL	1.17807	1.11756	1.26221	1.16687	1.1105	1.29227	1.2499	1.17573	1.28828	1.14349	1.08178	1.22604	1.12627	1.07364	1.18672	1.26075	1.1529	1.25109
	LDL1	0.745834	0.703418	0.705308	0.681019	0.669521	0.658301	0.715671	0.675601	0.659819	0.662532	0.63279	0.556575	0.648919	0.629867	0.541904	0.670477	0.660584	0.585233
	LAC1	0.632799	0.593372	0.619636	0.66062	0.650411	0.657797	0.639965	0.629687	0.625512	0.6361	0.67535	0.616036	0.641004	0.694027	0.619491	0.643245	0.716475	0.629242
	LDL2	0.498407	0.504885		0.510446	0.488542		0.496666	0.488743		0.496556	0.471472		0.492111	0.466364		0.500825	0.464877
	LAC2	0.474867	0.429668	0.480463	0.471746	0.417555	0.47932	0.475799	0.444517	0.479788	0.47543	0.532928	0.483381	0.468618	0.520902	0.476763	0.473841	0.531731	0.478552
	mHDL	0.716278	0.563705	0.208696	0.746717	0.509051	0.270037	0.67545	0.565924	0.31145	0.660623	0.557908	0.466957	0.671578	0.553042	0.476936	0.669082	0.539166	0.392963
	HDL1	0.488782	0.444916		0.488686	0.434808		0.442796	0.400593		0.466637	0.425127		0.466637	0.424263		0.430838	0.399762
	HDL2	0.54842		0.476135	0.599571		0.522967	0.553395		0.511286	0.509987		0.474019	0.501856		0.467201	0.50005		0.491526
	S4 Table. Scale parameters identified using different records. These parameters are the bases of S2 Table.
